# Supplementary material for: Physiological Variability during Prehospital Stroke Care: Which Monitoring and Interventions Are Used?
Source: MDPI journal article supplement (doi:10.3390/healthcare12080835), 2024-04-15
Supplement: s1 [file s1]

Supplementary material Figure S1

Figure S1: Newcastle–Ottawa scale scores

| Study               | Selection                            |                                 |                           | Comparability                                                            |                                              | Outcome                                  |                       |                                                 |                                  |             |
|---------------------|--------------------------------------|---------------------------------|---------------------------|--------------------------------------------------------------------------|----------------------------------------------|------------------------------------------|-----------------------|-------------------------------------------------|----------------------------------|-------------|
|                     | Representativeness of exposed cohort | Selection of non-exposed cohort | Ascertainment of exposure | Demonstration that outcome of interest was not present at start of study | Study controls for the most important factor | Study controls for any additional factor | Assessment of outcome | Was follow-up long enough for outcomes to occur | Adequacy of follow up of cohorts | Total Score |
| Fan 2015            | *                                    | *                               | *                         | *                                                                        | *                                            | *                                        | *                     | *                                               | *                                | 9           |
| Hatcher 2017        | *                                    | *                               | *                         | *                                                                        | *                                            | *                                        | *                     | *                                               | *                                | 9           |
| Slavin 2018         | *                                    | *                               | *                         | *                                                                        | *                                            | *                                        | *                     | *                                               | *                                | 9           |
| Atsumi 2019         | *                                    | *                               | *                         | *                                                                        | *                                            | *                                        | *                     | *                                               | *                                | 9           |
| Tsou 2019           | *                                    | *                               | *                         | *                                                                        | *                                            | *                                        | *                     | *                                               | *                                | 9           |
| Larsen 2022         | *                                    | *                               | *                         | *                                                                        | *                                            | *                                        | *                     | *                                               | *                                | 9           |
| Rodriguez-Luna 2018 | *                                    | *                               | *                         | *                                                                        | *                                            | *                                        | *                     | *                                               | *                                | 9           |
| Gioia 2016          | *                                    | *                               | *                         | *                                                                        | *                                            | .                                        | *                     | *                                               | *                                | 8           |
| Kench 2020          | N/A                                  | N/A                             | N/A                       | N/A                                                                      | N/A                                          | N/A                                      | N/A                   | N/A                                             | N/A                              | N/A         |
| Fouche 2020         | *                                    | *                               | *                         | *                                                                        | *                                            | *                                        | *                     | *                                               | *                                | 9           |
| Asaithambi 2012     | *                                    | *                               | *                         | *                                                                        | .                                            | .                                        | *                     | *                                               | *                                | 7           |

[illegible]
