# Supplementary material for: Physiological Variability during Prehospital Stroke Care: Which Monitoring and Interventions Are Used?
Source: MDPI journal article supplement (doi:10.3390/healthcare12080835), 2024-04-15
Supplement: s1 [file s1]

Supplementary material table S1

Table S1: Search strategy

| Ovid MEDLINE(R) ALL <1946 to February 07, 2022> |                                                                                                                                        | EBSCO CINAHL Tuesday, February 08, 2022 3:33:09 PM |                                                                                                                                                                                                                                                 |                           |
|-------------------------------------------------|----------------------------------------------------------------------------------------------------------------------------------------|----------------------------------------------------|-------------------------------------------------------------------------------------------------------------------------------------------------------------------------------------------------------------------------------------------------|---------------------------|
| 1                                               | (prehospital\$ or pre-hospital\$ or pre hospital\$ or ambulance\$ or paramedic\$ or EMS).tw. 106247                                    | #                                                  | <b>Query</b><br>prehospital* or pre-hospital* or pre hospital* or ambulance* or paramedic* or EMS                                                                                                                                               | <b>Results</b><br>Display |
| 2                                               | Emergency Medical Services/ 148969                                                                                                     | S1                                                 | (MH "Emergency Medical Services")                                                                                                                                                                                                               | Display                   |
|                                                 |                                                                                                                                        | S2                                                 | PHEM                                                                                                                                                                                                                                            | Display                   |
|                                                 |                                                                                                                                        | S3                                                 | ""out of hospital""                                                                                                                                                                                                                             | Display                   |
|                                                 |                                                                                                                                        | S4                                                 | (MH "Emergency Medical Technicians")                                                                                                                                                                                                            | Display                   |
| 3                                               | PHEM.mp. 90                                                                                                                            | S5                                                 | (MH "Prehospital Care")                                                                                                                                                                                                                         | Display                   |
|                                                 |                                                                                                                                        | S6                                                 | S1 OR S2 OR S3 OR S4 OR S5 OR S6                                                                                                                                                                                                                | Display                   |
| 4                                               | Emergency Responders/ 9522                                                                                                             | S7                                                 | MH CEREBROVASCULAR DISORDERS OR MH BASAL GANGLIA CEREBROVASCULAR DISEASE OR MH BRAIN ISCHEMIA OR MH CAROTID ARTERY DISEASES OR MH NTRACRANIAL ARTERIAL DISEASES OR MH ( "INTRACRANIAL EMBOLISM AND THROMBOSIS" ) OR MH INTRACRANIAL HEMORRHAGES | Display                   |
| 5                                               | "out of hospital".mp. 36924                                                                                                            |                                                    | (((stroke OR poststroke OR post-stroke OR cerebrovasc* OR brain) AND (vasc* OR cerebral)) AND (vasc* OR cva* OR apoplex* OR SAH))                                                                                                               | Display                   |
| 6                                               | or/1-5252394                                                                                                                           | S8                                                 | ((brain* OR cerebr* OR cerebell* OR intracran* OR intracerebral) N5 (isch?emi*                                                                                                                                                                  | Display                   |
| 7                                               | CEREBROVASCULAR DISORDERS/ or exp BASAL GANGLIA CEREBROVASCULAR DISEASE/ or exp BRAIN ISCHEMIA/ or exp CAROTID ARTERY DISEASES/ or exp | S9                                                 |                                                                                                                                                                                                                                                 |                           |
|                                                 |                                                                                                                                        | S10                                                |                                                                                                                                                                                                                                                 |                           |

|                                                                                                                                                                                                                                                                                                                                                                                                                                                                                                                                                                                                                                                                                                                                                                                                  |     |                                                                                                                                     |         |
|--------------------------------------------------------------------------------------------------------------------------------------------------------------------------------------------------------------------------------------------------------------------------------------------------------------------------------------------------------------------------------------------------------------------------------------------------------------------------------------------------------------------------------------------------------------------------------------------------------------------------------------------------------------------------------------------------------------------------------------------------------------------------------------------------|-----|-------------------------------------------------------------------------------------------------------------------------------------|---------|
| <p>INTRACRANIAL ARTERIAL DISEASES/ or exp INTRACRANIAL ARTERIOVENOUS MALFORMATIONS/ or exp "INTRACRANIAL EMBOLISM AND THROMBOSIS"/ or exp INTRACRANIAL HEMORRHAGES/ or STROKE/ or exp BRAIN INFARCTION/ or STROKE, LACUNAR/ or VASOSPASM, INTRACRANIAL/ or VERTEBRAL ARTERY DISSECTION/ or BRAIN INJURIES/ or BRAIN INJURY, CHRONIC/ 1585800</p> <p>8 (stroke or poststroke or post-stroke or cerebrovasc* or brain vasc* or cerebral vasc* or cva* or apoplex* or SAH).ti,ab. 871396</p> <p>9 ((brain* or cerebr* or cerebell* or intracran* or intracerebral) adj5 (isch?emi* or infarct* or thrombo* or emboli* or occlus*)).ti,ab.282389</p> <p>10 ((brain* or cerebr* or cerebell* or intracerebral or intracranial or subarachnoid) adj5 (haemorrhage* or hemorrhage* or haematoma* or</p> |     | OR infarct* OR thrombo* OR emboli* OR occlus*))                                                                                     |         |
|                                                                                                                                                                                                                                                                                                                                                                                                                                                                                                                                                                                                                                                                                                                                                                                                  |     | ((brain* OR cerebr* OR cerebell* OR intracerebral OR intracranial OR subarachnoid) N5 (haemorrhage* OR hemorrhage* OR haematoma* OR |         |
|                                                                                                                                                                                                                                                                                                                                                                                                                                                                                                                                                                                                                                                                                                                                                                                                  | S11 | hematoma* OR bleed*))                                                                                                               | Display |
|                                                                                                                                                                                                                                                                                                                                                                                                                                                                                                                                                                                                                                                                                                                                                                                                  | S12 | S8 OR S9 OR S10 OR S11                                                                                                              | Display |
|                                                                                                                                                                                                                                                                                                                                                                                                                                                                                                                                                                                                                                                                                                                                                                                                  |     | (MH "Hemodynamics") OR                                                                                                              |         |
|                                                                                                                                                                                                                                                                                                                                                                                                                                                                                                                                                                                                                                                                                                                                                                                                  | S13 | "h?emodynamic"                                                                                                                      | Display |
|                                                                                                                                                                                                                                                                                                                                                                                                                                                                                                                                                                                                                                                                                                                                                                                                  |     | (MH "Blood Pressure") OR "blood                                                                                                     |         |
|                                                                                                                                                                                                                                                                                                                                                                                                                                                                                                                                                                                                                                                                                                                                                                                                  | S14 | pressure"                                                                                                                           | Display |
|                                                                                                                                                                                                                                                                                                                                                                                                                                                                                                                                                                                                                                                                                                                                                                                                  | S15 | (MH "Heart Rate") OR "heart rate"                                                                                                   | Display |
|                                                                                                                                                                                                                                                                                                                                                                                                                                                                                                                                                                                                                                                                                                                                                                                                  |     | (MH "Carbon Dioxide") OR "carbon                                                                                                    |         |
|                                                                                                                                                                                                                                                                                                                                                                                                                                                                                                                                                                                                                                                                                                                                                                                                  | S16 | dioxide"                                                                                                                            | Display |
|                                                                                                                                                                                                                                                                                                                                                                                                                                                                                                                                                                                                                                                                                                                                                                                                  | S17 | (MH "Vital Signs") OR "vital sign"                                                                                                  | Display |
|                                                                                                                                                                                                                                                                                                                                                                                                                                                                                                                                                                                                                                                                                                                                                                                                  | S18 | (MH "Cerebrovascular Circulation")                                                                                                  | Display |
|                                                                                                                                                                                                                                                                                                                                                                                                                                                                                                                                                                                                                                                                                                                                                                                                  | S19 | cerebral n2 autoregulat*                                                                                                            | Display |
|                                                                                                                                                                                                                                                                                                                                                                                                                                                                                                                                                                                                                                                                                                                                                                                                  | S20 | (MH "Capnography") OR "capnograph"                                                                                                  | Display |
|                                                                                                                                                                                                                                                                                                                                                                                                                                                                                                                                                                                                                                                                                                                                                                                                  | S21 | (MH "Hypocapnia") OR "hypocapni"                                                                                                    | Display |
|                                                                                                                                                                                                                                                                                                                                                                                                                                                                                                                                                                                                                                                                                                                                                                                                  | S22 | (MH "Hypercapnia") OR "hypercapni"                                                                                                  | Display |
|                                                                                                                                                                                                                                                                                                                                                                                                                                                                                                                                                                                                                                                                                                                                                                                                  |     | ((diastolic or systolic or pulse) n2                                                                                                |         |
|                                                                                                                                                                                                                                                                                                                                                                                                                                                                                                                                                                                                                                                                                                                                                                                                  | S23 | pressure)                                                                                                                           | Display |
|                                                                                                                                                                                                                                                                                                                                                                                                                                                                                                                                                                                                                                                                                                                                                                                                  | S24 | (MH "Hypertension") OR "hypertension"                                                                                               | Display |
|                                                                                                                                                                                                                                                                                                                                                                                                                                                                                                                                                                                                                                                                                                                                                                                                  | S25 | (MH "Hypotension") OR "Hypotension"                                                                                                 | Display |
|                                                                                                                                                                                                                                                                                                                                                                                                                                                                                                                                                                                                                                                                                                                                                                                                  | S26 | cardiac rate                                                                                                                        | Display |
|                                                                                                                                                                                                                                                                                                                                                                                                                                                                                                                                                                                                                                                                                                                                                                                                  | S27 | (MH "Tachycardia") OR "tachycardia"                                                                                                 | Display |
|                                                                                                                                                                                                                                                                                                                                                                                                                                                                                                                                                                                                                                                                                                                                                                                                  | S28 | (MH "Bradycardia") OR "bradycardia"                                                                                                 | Display |
|                                                                                                                                                                                                                                                                                                                                                                                                                                                                                                                                                                                                                                                                                                                                                                                                  | S29 | (MH "Oxygenation") OR "Oxygenation"                                                                                                 | Display |
|                                                                                                                                                                                                                                                                                                                                                                                                                                                                                                                                                                                                                                                                                                                                                                                                  | S30 | ""End tidal CO2""                                                                                                                   | Display |
|                                                                                                                                                                                                                                                                                                                                                                                                                                                                                                                                                                                                                                                                                                                                                                                                  | S31 | "capnometr"                                                                                                                         | Display |
|                                                                                                                                                                                                                                                                                                                                                                                                                                                                                                                                                                                                                                                                                                                                                                                                  | S32 | (MH "Oximetry") OR "Oximetr"                                                                                                        | Display |

|                                                                                                                                                               |                   |                                                                                                                                                                                |                   |
|---------------------------------------------------------------------------------------------------------------------------------------------------------------|-------------------|--------------------------------------------------------------------------------------------------------------------------------------------------------------------------------|-------------------|
| hematoma* or bleed*).ti,ab.<br>180998                                                                                                                         | S33               | (MH "Oxygen Saturation") OR "Oxygen Saturation"                                                                                                                                | Display           |
| 11 7 or 8 or 9 or 10 2039098                                                                                                                                  |                   | S13 OR S14 OR S15 OR S16 OR S17 OR S18<br>OR S19 OR S20 OR S21 OR S22 OR S23 OR<br>S24 OR S25 OR S26 OR S27 OR S28 OR S29<br>OR S30 OR S31 OR S32 OR S33                       | Display           |
| 12 h?emodynamic*.mp. or<br>Hemodynamic Monitoring/ or<br>Hemodynamics/ 608178                                                                                 | S34<br>S35<br>S36 | S7 AND S12 AND S34<br>S13 OR S18 OR S19<br>S14 OR S15 OR S16 OR S17 OR S20 OR S21<br>OR S22 OR S23 OR S24 OR S25 OR S26 OR<br>S27 OR S28 OR S29 OR S30 OR S31 OR S32<br>OR S33 | Display<br>31,465 |
| 13 blood pressure.mp. or Blood<br>Pressure/ 1125369                                                                                                           | S37<br>S38        | S7 AND S12 AND S36 AND S37                                                                                                                                                     | 294,009<br>21     |
| 14 heart rate.mp. or Heart Rate/<br>580820                                                                                                                    |                   |                                                                                                                                                                                |                   |
| 15 carbon dioxide.mp. or Carbon<br>Dioxide/ 288641                                                                                                            |                   |                                                                                                                                                                                |                   |
| 16 vital sign*.mp. or Vital Signs/<br>58941                                                                                                                   |                   |                                                                                                                                                                                |                   |
| 17 (cerebral adj2<br>autoregulat*).mp. or Cerebrovascular<br>Circulation/ [mp=ti, ab, hw, tn, ot, dm,<br>mf, dv, kf, fx, dq, nm, ox, px, rx, ui, sy]<br>78400 |                   |                                                                                                                                                                                |                   |

|    |                                                                                                                                              |  |
|----|----------------------------------------------------------------------------------------------------------------------------------------------|--|
| 18 | Capnography/ or<br>capnograph*.mp. [mp=ti, ab, hw, tn,<br>ot, dm, mf, dv, kf, fx, dq, nm, ox, px, rx,<br>ui, sy] 9229                        |  |
| 19 | Hypocapnia/ or hypocapni*.mp.<br>8114                                                                                                        |  |
| 20 | Hypercapnia/ or<br>hypercapni*.mp. 42457                                                                                                     |  |
| 21 | ((diastolic or systolic or pulse)<br>adj2 pressure).mp. [mp=ti, ab, hw, tn,<br>ot, dm, mf, dv, kf, fx, dq, nm, ox, px, rx,<br>ui, sy] 385008 |  |
| 22 | Hypertension/ or<br>hypertension.mp. 1509563                                                                                                 |  |
| 23 | hypotension.mp. or<br>Hypotension/ 247186                                                                                                    |  |
| 24 | cardiac rate.mp. 1554                                                                                                                        |  |
| 25 | tachycardia.mp. or exp<br>Tachycardia/265759                                                                                                 |  |

|    |                                                                                                   |  |
|----|---------------------------------------------------------------------------------------------------|--|
| 26 | bradycardia.mp. or Bradycardia/<br>94556                                                          |  |
| 27 | Oxygenation.mp. 185368                                                                            |  |
| 28 | "End tidal CO2".mp. 7217                                                                          |  |
| 29 | capnometr*.mp. [mp=tj, ab, hw,<br>tn, ot, dm, mf, dv, kf, fx, dq, nm, ox,<br>px, rx, ui, sy] 4103 |  |
| 30 | Oximetry/ 24615                                                                                   |  |
| 31 | Oximetr*.mp. 51416                                                                                |  |
| 32 | Oxygen Saturation.mp.<br>117013                                                                   |  |
| 33 | or/12-32 3789242                                                                                  |  |
| 34 | 6 and 11 and 33 4367                                                                              |  |
| 35 | 12 or 17 673323                                                                                   |  |
| 36 | or/13-16,18-32 3424650                                                                            |  |
| 37 | 6 and 11 and 35 and 36 447                                                                        |  |

|    |                                                                                                                          |        |
|----|--------------------------------------------------------------------------------------------------------------------------|--------|
| 38 | (prehospital\$ or pre-hospital\$ or pre hospital\$ or ambulance\$ or paramedic\$ or EMS).tw.                             | 106247 |
| 39 | emergency health service/                                                                                                | 154496 |
| 40 | rescue personnel/ or ambulance/                                                                                          | 28863  |
| 41 | PHEM.mp.                                                                                                                 | 90     |
| 42 | "out of hospital".mp.                                                                                                    | 36924  |
| 43 | or/38-42                                                                                                                 | 259271 |
| 44 | exp "CEREBROVASCULAR ACCIDENT"/                                                                                          | 409597 |
| 45 | (stroke or poststroke or post-stroke or cerebrovasc* or brain vasc* or cerebral vasc* or cva* or apoplex* or SAH).ti,ab. | 871396 |
| 46 | ((brain* or cerebr* or cerebell* or intracran* or intracerebral) adj5                                                    |        |

(isch?emi\* or infarct\* or thrombo\* or emboli\* or occlus\*)).ti,ab.282389

47 ((brain\* or cerebr\* or cerebell\* or intracerebral or intracranial or subarachnoid) adj5 (haemorrhage\* or hemorrhage\* or haematoma\* or hematoma\* or bleed\*)).ti,ab.  
180998

48 CEREBROVASCULAR  
DISORDERS/ or exp BASAL GANGLIA  
CEREBROVASCULAR DISEASE/ or exp  
BRAIN ISCHEMIA/ or exp CAROTID  
ARTERY DISEASES/ or exp  
INTRACRANIAL ARTERIAL DISEASES/ or  
exp "INTRACRANIAL EMBOLISM AND  
THROMBOSIS"/ or exp INTRACRANIAL  
HEMORRHAGES/ or STROKE/ or exp  
BRAIN INFARCTION/ or exp  
VERTEBRAL ARTERY DISSECTION/  
1469442

49 or/44-48 1959782

50 hemodynamics/ or  
h?emodynamic\*.mp. 608178

|    |                                                                                                                        |  |
|----|------------------------------------------------------------------------------------------------------------------------|--|
| 51 | hemodynamic monitoring/<br>16709                                                                                       |  |
| 52 | blood pressure.mp. or blood<br>pressure/ 1125369                                                                       |  |
| 53 | heart rate.mp. or heart rate/<br>580820                                                                                |  |
| 54 | carbon dioxide.mp. or carbon<br>dioxide/ 288641                                                                        |  |
| 55 | vital sign/ or vital sign*.mp.<br>58941                                                                                |  |
| 56 | brain blood flow/ or<br>autoregulation/ 195646                                                                         |  |
| 57 | (cerebral adj2<br>autoregulat*).mp. [mp=ti, ab, hw, tn,<br>ot, dm, mf, dv, kf, fx, dq, nm, ox, px, rx,<br>ui, sy] 7085 |  |
| 58 | capnograph*.mp. or<br>capnography/ 9229                                                                                |  |



|    |                                                                |  |
|----|----------------------------------------------------------------|--|
| 59 | hypocapnia/ or hypocapni*.mp.<br>8114                          |  |
| 60 | hypercapnia/ or<br>hypercapni*.mp. 42457                       |  |
| 61 | ((diastolic or systolic or pulse)<br>adj2 pressure).mp. 385008 |  |
| 62 | diastolic blood pressure/<br>105556                            |  |
| 63 | systolic blood pressure/<br>175833                             |  |
| 64 | hypertension.mp. or<br>hypertension/ 1509563                   |  |
| 65 | hypotension/ or<br>Hypotension.mp. 247186                      |  |
| 66 | cardiac rate.mp. 1554                                          |  |
| 67 | tachycardia/ or tachycardia.mp.<br>260033                      |  |

|    |                                                       |  |
|----|-------------------------------------------------------|--|
| 68 | bradycardia.mp. or bradycardia/<br>94556              |  |
| 69 | Oxygenation.mp. or blood<br>oxygenation/ 185368       |  |
| 70 | end tidal carbon dioxide<br>tension/ 9249             |  |
| 71 | "End tidal CO2".mp. 7217                              |  |
| 72 | capnometry/ or<br>capnometr*.mp. 6493                 |  |
| 73 | oximetry/ or Oximetr*.mp.<br>51416                    |  |
| 74 | oxygen saturation.mp. or<br>oxygen saturation/ 117013 |  |
| 75 | pulse oximetry/ 31959                                 |  |
| 76 | or/50-75 3880549                                      |  |
| 77 | 43 and 49 and 76 4189                                 |  |

|    |                                  |  |
|----|----------------------------------|--|
| 78 | 50 or 51 or 56 or 57<br>784516   |  |
| 79 | or/52-55,58-75     3420610       |  |
| 80 | 43 and 49 and 78 and 79   445    |  |
| 81 | 37 or 80     509                 |  |
| 82 | remove duplicates from 81<br>448 |  |
